# Supplementary material for: Nucleophilic reactivity of Zinc-bound thiolates: subtle interplay between coordination set and conformational flexibility
Source: Royal Society of Chemistry journal article supplement (doi:10.1039/c2sc21029k), 2012-01-01
Supplement: c2sc21029k.pdf [file c2sc21029k.pdf]

# Nucleophilic Reactivity of Zinc-Bound Thiolates: Subtle Interplay between Coordination Set and Conformational Flexibility

Manon Isaac, Jean-Marc Latour, Olivier Sénéque

*Laboratoire de Chimie et Biologie des Métaux, UMR CEA-CNRS-UJF 5249  
CEA-Grenoble, 17 rue des Martyrs, 38054 Grenoble Cedex 9, France*

olivier.seneque@cea.fr

## Supplementary Information

### Experimental Section

**Materials and Methods:** N- $\alpha$ -Fmoc-protected amino acids, PyBOP and resins were obtained from Novabiochem. Other reagents for peptide synthesis, solvents, buffers and metal salts were purchased from Sigma-Aldrich. HPLC analyses and purifications were performed on a VWR LaPrep system. ESI-MS analyses were performed on a Thermo LXQ spectrometer. UV-Vis spectra were recorded on a Perkin-Elmer Lambda 35 spectrophotometer or on a Cary 50 spectrophotometer. CD spectra were recorded on an Applied Photophysics Chirascan spectropolarimeter or on a Biologic MOS-450 AF-CD spectropolarimeter. Fluorescence emission spectra were recorded on Perkin-Elmer LS-50B or Cary Eclipse fluorescence spectrometers. UV-Vis, CD and fluorescence spectrometers are equipped with a thermo-regulated cell holder. All buffer or metal solutions were prepared with MilliQ water (Millipore) and purged with argon. Buffer solutions were treated with Chelex 100 resin (Biorad) to remove metal traces.  $\text{CoSO}_4$ ,  $\text{Zn}(\text{ClO}_4)_2$  and  $\text{ZnCl}_2$  (99.999%) stock solutions were prepared by dissolving the metal salt in water. Their precise concentration was determined by colorimetric EDTA titration.<sup>1</sup>

**Peptide synthesis:**  $\text{L}_{\text{HSP}}$  and CP1 variants were assembled manually by solid-phase peptide synthesis on 2-chlorotrityl chloride and NovaPeG Rink Amide resins, respectively, using Fmoc chemistry with PyBOP activation as previously described.<sup>2, 3</sup> The peptides were purified by RP-HPLC (PurospherStar RP18e 5 $\mu\text{m}$  C18 particles, 50 mm  $\times$  25 mm, solvent A =  $\text{H}_2\text{O}$ /TFA 99.9:0.1, solvent B =  $\text{CH}_3\text{CN}$ / $\text{H}_2\text{O}$ /TFA 90:10:0.1, flow rate 30 mL/min, gradient 5 to 70% B in 28 min). Analytical RP-HPLC (PurospherStar RP18e 5 $\mu\text{m}$  C18 particles, 150 mm  $\times$  4.6 mm, gradient 5 to 50% B in 28 min) were performed at 1.0 mL/min with UV monitoring at 214 nm.  $\text{L}_{\text{HSP}}(\text{HCCC})$ :  $t_{\text{R}}(\text{analytical}) = 16.7$  min; ESI-MS  $m/z = 1171.6$   $[\text{M}+2\text{H}]^{2+}$ , 781.4  $[\text{M}+3\text{H}]^{3+}$ , 586.3  $[\text{M}+4\text{H}]^{4+}$  (calculated: 1171.55  $[\text{M}+2\text{H}]^{2+}$ , 781.36

[M+3H]<sup>3+</sup>, 586.27 [M+4H]<sup>4+</sup>). L<sub>HSP</sub>(CHCC): *t*<sub>R</sub>(analytical) = 16.5 min; ESI-MS *m/z* = 1171.6 [M+2H]<sup>2+</sup>, 781.4 [M+3H]<sup>3+</sup>, 586.3 [M+4H]<sup>4+</sup> (calculated: 1171.55 [M+2H]<sup>2+</sup>, 781.36 [M+3H]<sup>3+</sup>, 586.27 [M+4H]<sup>4+</sup>). L<sub>HSP</sub>(HHCC): *t*<sub>R</sub>(analytical) = 16.2 min; ESI-MS *m/z* = 1188.7 [M+2H]<sup>2+</sup>, 792.8 [M+3H]<sup>3+</sup>, 594.8 [M+4H]<sup>4+</sup> (calculated: 1188.59 [M+2H]<sup>2+</sup>, 792.72 [M+3H]<sup>3+</sup>, 594.79 [M+4H]<sup>4+</sup>).

**Absorbance, CD and fluorescence titrations:** The peptides were dissolved in the buffer under an argon atmosphere. The concentration of the peptide was determined by measuring cysteine free thiol concentration using Ellman's reagent.<sup>4</sup> TCEP was added to the peptide solution (0.25-1.0 mM) to prevent the formation of disulfide during long titrations. Titrations were performed at 298 K under argon by adding aliquots of a degassed metal stock solution to a rubber-sealed quartz cell (0.4 cm or 1 cm path length) containing the peptide solution. UV-Vis spectra were recorded every 1 nm at a scan rate of 240 nm/min. The CD signal was recorded every 1 nm with a 2 s signal averaging for each point. Each spectrum was recorded twice and averaged. Fluorescence emission spectra were recorded at 298 K from 290 nm to 480 nm (1 nm step) with excitation of the tyrosine chromophore at 280 nm. For L<sub>HSP</sub>(HCCC) and L<sub>HSP</sub>(CHCC) which form only 1:1 complexes, the Zn<sup>2+</sup> binding constants were derived from competition experiments as previously described.<sup>3, 5</sup> For L<sub>HSP</sub>(HHCC), both SPECFIT<sup>6</sup> and HySS2009<sup>7</sup> were used to determine the formation constant of the 1:1 and 1:2 complex. SPECFIT/32 was used to analyze the direct titration and the EDTA competition independently. This yielded allowed to estimate *K*<sub>1:1</sub> from the competition with EDTA and *K*<sub>1:2</sub> was estimated from the direct titration. These constants were further refined by simulating the two titrations with the same set of parameters with HySS2009.

**NMR Spectroscopy and structure calculations:** All of the NMR experiments were performed as previously described.<sup>2, 5</sup> The structures of Zn·L<sub>HSP</sub>(CHCC) and Zn·L<sub>HSP</sub>(HCCC) were calculated as described previously<sup>5</sup> using the program XPLOR 3.851<sup>8</sup> with H-H distance constraints derived from NOESY spectra (300 ms mixing time) and  $\phi$  and  $\chi^1$  dihedral restraints derived from 1D <sup>1</sup>H spectra or from 2D soft-COSY experiments. In house modifications were incorporated in the topology and parameter files for zinc binding to cysteines and histidines in a tetrahedral geometry with 2.33 Å and 2.00 Zn-S and Zn-N bonds, respectively, 109.4°, 109.4°, 105° and 125° S-Zn-S and S-Zn-N, Zn-S-C and Zn-N-C angles, respectively. Structures selected for analysis had no NOE violations greater than 0.3 Å and no dihedral angle violations greater than 5°.

**Kinetic measurements:** Rate constants for the oxidation of the zinc complexes were obtained according to the procedure described previously. A solution of the zinc complex (≈1

mM) was prepared by dissolving the peptide in H<sub>2</sub>O (the precise concentration was determined using DTNB assay<sup>4</sup>), adding 1.1 eq. of ZnCl<sub>2</sub> and adjusting the pH to 7.0 with NaOH. The complex was diluted to 5-10 μM in phosphate buffer 100 mM pH 8.0, with EGTA (0.5 mM) for the Zn(Cys)<sub>4</sub> models. Excess H<sub>2</sub>O<sub>2</sub> was added and the time dependence of the UV (220 nm) or fluorescence ( $\lambda_{\text{em}} = 305 \text{ nm}$ ,  $\lambda_{\text{ex}} = 280 \text{ nm}$ ) signal was recorded. The kinetic traces were fitted with a single exponential, except for Zn-CP1(CCHC) for which bi-exponential fit was required, as stated above in the text. Plots of the observed first order rate constant  $k^{\text{obs}}$  against [H<sub>2</sub>O<sub>2</sub>] yielded the second order rate constant  $k$ , which was determined at nine different temperatures in the range 287-331 K (the same cell holder, whose temperature was set using a Peltier apparatus, was used for fluorescence and UV-Vis measurements). The activation parameters  $\Delta H^\ddagger$  and  $\Delta S^\ddagger$  were drawn from Eyring plots.

### Co<sup>2+</sup> titrations

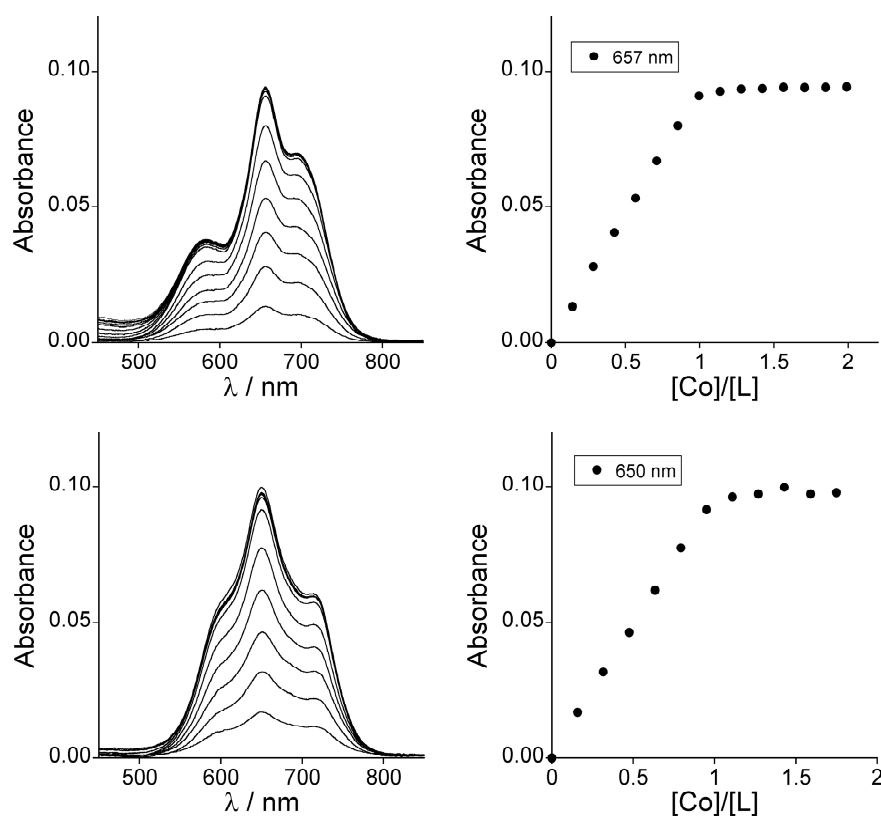

**Fig. S1.** UV-Vis Titration of L<sub>HSP</sub>(HCCC) 135 μM (top) and L<sub>HSP</sub>(CHCC) 138 μM (bottom) by CoSO<sub>4</sub>, BisTris 100 mM / KCl 100 mM pH 7.0, TCEP 270 μM, 298K. Spectra were corrected for dilution.

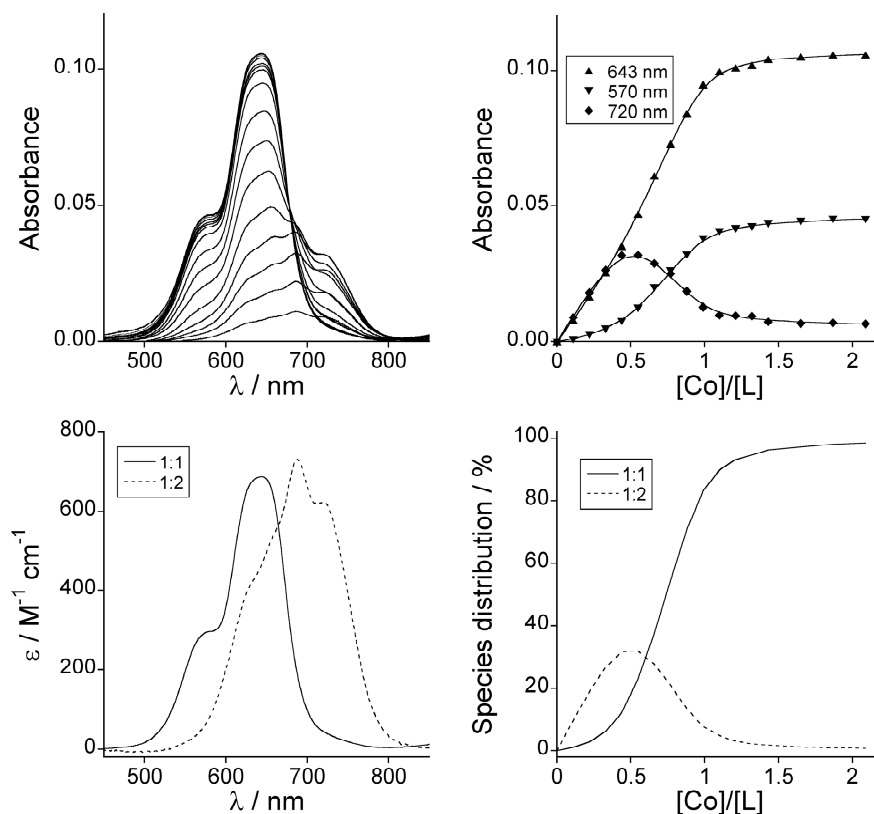

**Fig. S2.** UV-Vis Titration of  $L_{HSP}(HHCC)$  155  $\mu M$  (bottom) by  $CoSO_4$ , BisTris 100 mM / KCl 100 mM pH 7.0, TCEP 270  $\mu M$ , 298K. Spectra were corrected for dilution. The fit obtained with SPECFIT/32<sup>6</sup> is displayed as solid lines on top-right panel. The spectra of the 1:2 and 1:1 complexes derived from the fit are displayed on bottom-left panel and the species distribution during the titration is on bottom-right panel. The fit yields  $\log K_{1:1} = 7.6$  (2) and  $\log K_{1:2} = 12.4$  (2).

### $Zn^{2+}$ titrations

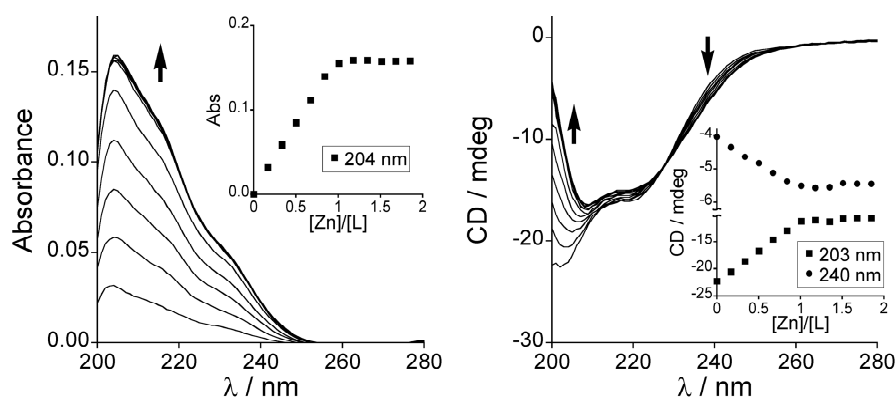

**Fig. S3.** UV-Vis (left) and CD (right) titrations of  $L_{HSP}(CHCC)$  (21  $\mu M$ ) by  $Zn^{2+}$  in phosphate buffer 20 mM pH 7.0, TCEP 250  $\mu M$ , 298 K (path length = 0.4 cm). (Insets) Evolution of the UV or CD signal against metal/peptide ratio. For UV-Vis, the spectrum of the free peptide was subtracted from each spectrum. All spectra were corrected for dilution.

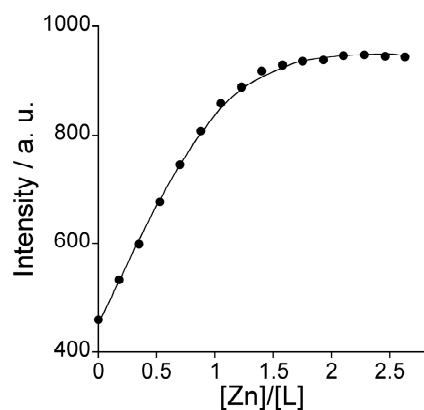

**Fig. S4.** Fluorescence titration of  $L_{HSP}(HCCC)$  ( $17 \mu M$ ) and EDTA ( $17 \mu M$ ) by  $Zn^{2+}$  in phosphate buffer 100 mM pH 7.0, TCEP  $250 \mu M$ , 298 K. Excitation and emission wavelength were 280 nm and 305 nm, respectively. Data were corrected for dilution. The solid line corresponds to the fit obtained with SPECFIT/32<sup>6</sup> which yielded  $\log K_{1:1} = 14.2$  (2) using  $\log K_{ZnEDTA} = 13.1$ .

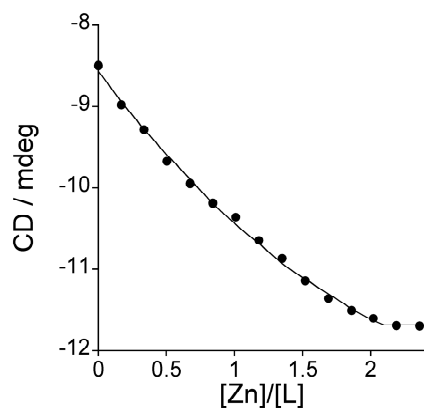

**Fig. S5.** CD titration of  $L_{HSP}(CHCC)$  ( $42 \mu M$ ) and EDTA ( $46 \mu M$ ) by  $Zn^{2+}$  in phosphate buffer 100 mM pH 7.0, TCEP  $250 \mu M$ , 298 K. The evolution of CD signal at 238 nm is presented. Data were corrected for dilution. The solid line corresponds to the fit obtained that yielded  $\log K_{1:1} = 13.5$  (2) using  $\log K_{ZnEDTA} = 13.1$ .

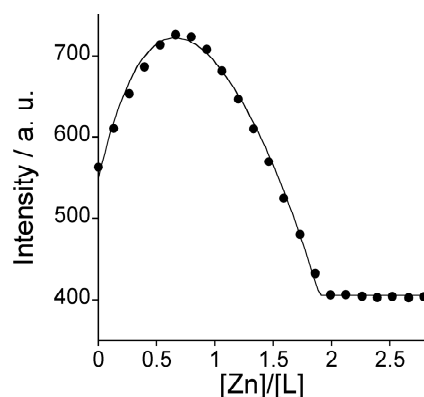

**Fig. S6.** Fluorescence titration of  $L_{HSP}(HHCC)$  ( $27 \mu M$ ) and EDTA ( $24 \mu M$ ) by  $Zn^{2+}$  in phosphate buffer 100 mM pH 7.0, TCEP  $250 \mu M$ , 298 K. Excitation and emission wavelength were 280 nm and 308 nm, respectively. Data were corrected for dilution. The solid line corresponds to the fit obtained by using SPECFIT/32<sup>6</sup> and HySS2009<sup>7</sup> which yielded  $\log K_{1:1} = 13.4$  (1) and  $\log K_{1:2} = 17.6$  (2). The binding constant of the Zn-EDTA complex at pH 7.0 ( $10^{13.1}$ ) was introduced in the fit.

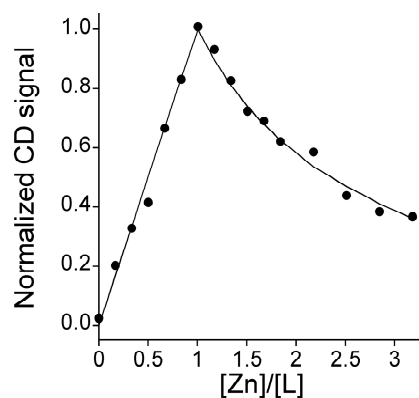

**Fig. S7.** CD titration of  $L_{HSP}(CCCC)^{lin}$  (28  $\mu$ M) by  $Zn^{2+}$  in 20 mM phosphate buffer pH 7.0, TCEP 250  $\mu$ M, 298 K. The solid line correspond to the fit obtained with SPECFIT/32 with formation of 1:1 and 3:2 zinc/peptide complexes (the data could also be satisfactorily fitted with 4:3, 5:4, ... complexes instead of the 3:2 complex). The 1:1 binding constant  $K_{1:1}$  was set to  $10^{13.5}$ . This value was derived from competition with EDTA. The normalized evolution of CD signal at 230 nm is presented. Data were corrected for dilution.

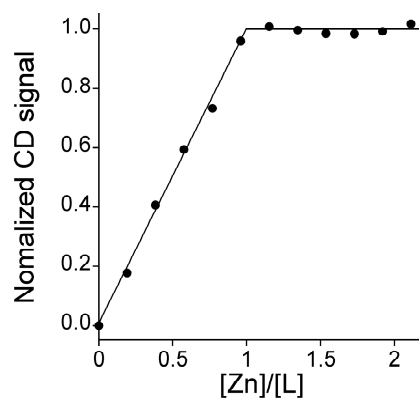

**Fig. S8.** CD titration of  $L_{HSP}(CCCC)^{lin}$  (25  $\mu$ M) and EGTA (100  $\mu$ M) by  $Zn^{2+}$  in phosphate buffer 100 mM pH 7.0, TCEP 250  $\mu$ M, 298 K. The normalized evolution of CD signal at 230 nm is presented. Data were corrected for dilution.

## ESI/MS monitoring of the oxidation of Zn·CP1(CCHC) by H<sub>2</sub>O<sub>2</sub>

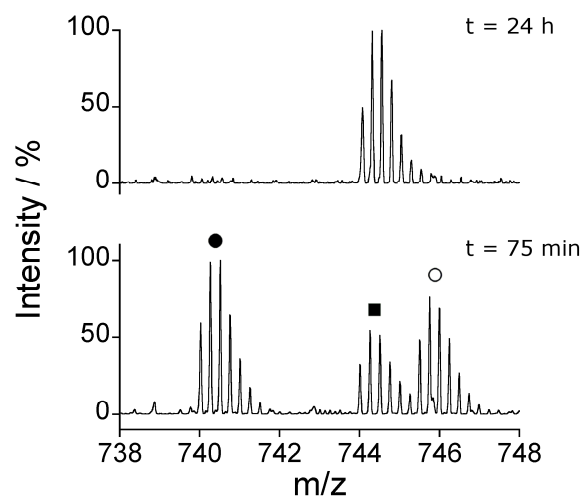

**Fig. S9.** ESI/MS monitoring of the oxidation of Zn·CP1(CCHC) by H<sub>2</sub>O<sub>2</sub> 20 mM in phosphate buffer pH 8.0. The region corresponding to the tetra-charged sulfinic and sulfonic acid peptide is shown. ● and ○: [M+4H]<sup>4+</sup> and [M+3H+Na]<sup>4+</sup> peaks correspondin to CP1(CCHC)(-SS-, -SO<sub>2</sub>H) (disulfide + silfinic acid). ■: [M+4H]<sup>4+</sup> peak corresponding to CP1(CCHC)(-SS-, -SO<sub>3</sub>H) (disulfide + sulfonic acid).

## NMR spectra of the Zn·CP1 complexes

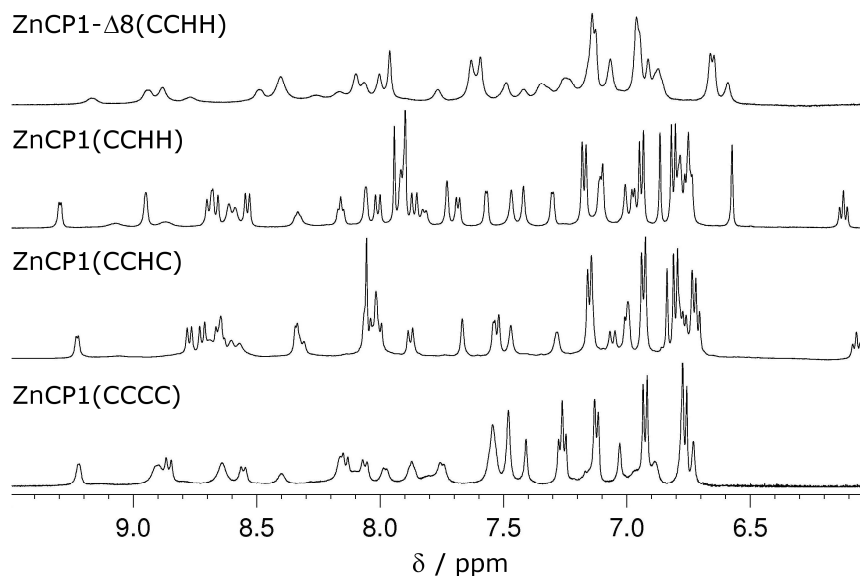

**Fig. S10.** NH and aromatic region of the <sup>1</sup>H NMR spectra (500 MHz) of the the Zn·CP1 complexes (≈ 2 mM in H<sub>2</sub>O/D<sub>2</sub>O 9:1 pH 6.5 at 298 K).

NMR characterization of the Zn-L<sub>HSP</sub> complexes

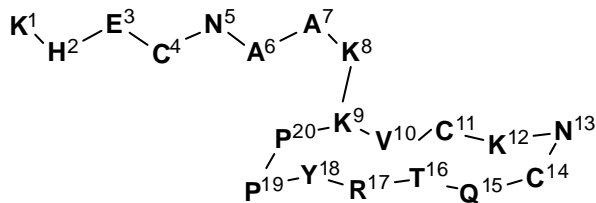

Scheme S1. Numbering of amino-acids for the NMR data of L<sub>HSP</sub>(HCCC).

Table S1. <sup>1</sup>H NMR (500 MHz) chemical shifts  $\delta$  (ppm) for Zn-L<sub>HSP</sub>(HCCC) in H<sub>2</sub>O/D<sub>2</sub>O 9:1 (pH 6.2) at 298 K.<sup>a</sup>

| Residue             | HN   | H $\alpha$ | H $\beta$                                       | Others                                                                                                                                  |
|---------------------|------|------------|-------------------------------------------------|-----------------------------------------------------------------------------------------------------------------------------------------|
| Ac                  |      | 2.03       |                                                 |                                                                                                                                         |
| LYS 1               | 8.34 | 4.30       | 1.76                                            | CH <sub>2</sub> ( $\gamma$ ): 1.41; CH <sub>2</sub> ( $\delta$ ): 1.68; CH <sub>2</sub> ( $\epsilon$ ): 2.98                            |
| HIS 2               | 8.51 | 4.69       | 3.13                                            | ImH(2), 6.81; ImH(4): 7.95                                                                                                              |
| GLU 3               | 8.44 | 4.24       | 1.82                                            | CH <sub>2</sub> ( $\gamma$ ): 2.04, 2.15                                                                                                |
| CYS 4               | 8.32 | 4.41       | 2.37 ( <i>pro-S</i> ),<br>2.90 ( <i>pro-R</i> ) |                                                                                                                                         |
| ASN 5               | 7.73 | 4.25       | 2.76, 3.02                                      | NH <sub>2</sub> ( $\delta$ ), 6.77, 7.49                                                                                                |
| ALA 6               | 8.25 | 3.26       | 1.20                                            |                                                                                                                                         |
| ALA 7               | 7.86 | 4.08       | 1.34                                            |                                                                                                                                         |
| LYS 8               | 7.67 | 4.21       | 1.96                                            | CH <sub>2</sub> ( $\gamma$ ): 1.38, 1.45; CH <sub>2</sub> ( $\delta$ ): 1.64; CH <sub>2</sub> ( $\epsilon$ ): 2.96                      |
| LYS 9               | 7.71 | 4.41       | 1.97                                            | CH <sub>2</sub> ( $\gamma$ ): 1.15; CH <sub>2</sub> ( $\delta$ ): 1.52; CH <sub>2</sub> ( $\epsilon$ ): 2.94, 3.40; NH( $\zeta$ ): 7.35 |
| VAL 10              | 8.42 | 4.48       | 1.82                                            | CH <sub>3</sub> ( $\gamma$ ): 0.69, 0.79                                                                                                |
| CYS 11              | 8.80 | 4.46       | 2.94 ( <i>pro-S</i> ),<br>3.27 ( <i>pro-R</i> ) |                                                                                                                                         |
| LYS 12              | 9.07 | 4.11       | 1.88                                            | CH <sub>2</sub> ( $\gamma$ ): 1.55; CH <sub>2</sub> ( $\delta$ ): 1.74; CH <sub>2</sub> ( $\epsilon$ ): 3.06                            |
| ASN 13              | 8.86 | 4.57       | 2.00, 2.20                                      | NH <sub>2</sub> ( $\delta$ ), 6.91, 7.81                                                                                                |
| CYS 14              | 8.08 | 4.89       | 3.36 ( <i>pro-S</i> ),<br>2.63 ( <i>pro-R</i> ) |                                                                                                                                         |
| GLN 15              | 8.01 | 4.00       | 2.26, 2.37                                      | CH <sub>2</sub> ( $\gamma$ ): 2.19, 2.26; NH <sub>2</sub> ( $\epsilon$ ), 6.52, 7.22                                                    |
| THR 16              | 8.14 | 3.96       | 3.76                                            | CH <sub>3</sub> ( $\gamma$ ): 0.73, OH( $\gamma$ ): 4.46                                                                                |
| ARG 17              | 8.26 | 4.85       | 1.66                                            | CH <sub>2</sub> ( $\gamma$ ): 1.44; CH <sub>2</sub> ( $\delta$ ): 3.13, 3.23; NH( $\epsilon$ ): 7.30                                    |
| TYR 18              | 9.16 | 4.90       | 2.84, 2.90                                      | CH( $\delta$ ): 6.90; CH( $\epsilon$ ): 6.67                                                                                            |
| <sup>D</sup> PRO 19 | -    | 4.76       | 1.93 ( <i>pro-S</i> ),<br>2.26 ( <i>pro-R</i> ) | CH <sub>2</sub> ( $\gamma$ ): 1.99, 2.11; CH <sub>2</sub> ( $\delta$ ): 3.39, 3.78                                                      |
| PRO 20              | -    | 4.42       | 1.98 ( <i>pro-R</i> ),<br>2.26 ( <i>pro-S</i> ) | CH <sub>2</sub> ( $\gamma$ ): 2.07; CH <sub>2</sub> ( $\delta$ ): 3.74, 4.07                                                            |

<sup>a</sup> Chemical shifts are measured relative to internal DSS.

Table S2. <sup>3</sup>J<sub>HN,H $\alpha$</sub>  coupling constants (Hz) for Zn-L<sub>HSP</sub>(HCCC) in H<sub>2</sub>O/D<sub>2</sub>O 9:1 (pH 6.2) at 298 K.

|        |        |        |        |        |        |        |        |        |
|--------|--------|--------|--------|--------|--------|--------|--------|--------|
| LYS 1  | HIS 2  | GLU 3  | CYS 4  | ASN 5  | ALA 6  | ALA 7  | LYS 8  | LYS 9  |
| 6.7    | 5.9    | -      | 7.4    | <6     | <4     | 5.9    | 7.7    | 8.4    |
| VAL 10 | CYS 11 | LYS 12 | ASN 13 | CYS 14 | GLN 15 | THR 16 | ARG 17 | TYR 18 |
| 9.9    | 5.3    | 4.4    | 8.4    | 9.7    | 7.4    | 5.4    | 8.2    | 9.9    |

Table S3. <sup>3</sup>J<sub>H $\alpha$ ,H $\beta$</sub>  coupling constants (Hz) for Zn-L<sub>HSP</sub>(HCCC) in D<sub>2</sub>O at 298 K.

| CYS 4        |              | CYS 11       |              | CYS 14       |              |
|--------------|--------------|--------------|--------------|--------------|--------------|
| <i>pro-R</i> | <i>pro-S</i> | <i>pro-R</i> | <i>pro-S</i> | <i>pro-R</i> | <i>pro-S</i> |
| 9.1          | 4.5          | 12.4         | 4.9          | 3.0          | 4.9          |



**Table S4.** NOE-derived distances (Å) used for calculations with XPLOR for Zn-L<sub>HSP</sub>(HCCC).

|     |   |      |     |    |     |      |     |    |      |     |    |     |      |
|-----|---|------|-----|----|-----|------|-----|----|------|-----|----|-----|------|
| LYS | 1 | HN   | LYS | 1  | HA  | 3.30 | CYS | 11 | HB2  | CYS | 11 | HA  | 2.35 |
| LYS | 1 | HN   | LYS | 1  | HB* | 3.45 | CYS | 11 | HN   | CYS | 11 | HA  | 3.87 |
| LYS | 1 | HN   | HIS | 2  | HA  | 3.30 | CYS | 11 | HN   | CYS | 11 | HB1 | 2.37 |
| HIS | 2 | HD2  | LYS | 1  | HA  | 3.79 | CYS | 11 | HN   | CYS | 11 | HB2 | 2.47 |
| HIS | 2 | HN   | LYS | 1  | HA  | 2.71 | CYS | 11 | HB1  | GLN | 15 | HA  | 3.07 |
| HIS | 2 | HB*  | HIS | 2  | HA  | 2.54 | CYS | 11 | HN   | GLN | 15 | HA  | 3.42 |
| HIS | 2 | HD2  | HIS | 2  | HA  | 3.51 | CYS | 11 | HN   | GLN | 15 | HN  | 3.34 |
| HIS | 2 | HD2  | HIS | 2  | HB* | 2.86 | CYS | 11 | HN   | THR | 16 | HB  | 4.00 |
| HIS | 2 | HE1  | HIS | 2  | HB* | 4.81 | CYS | 11 | HN   | THR | 16 | HN  | 3.38 |
| HIS | 2 | HN   | HIS | 2  | HA  | 3.19 | CYS | 11 | HN   | ARG | 17 | HA  | 2.98 |
| HIS | 2 | HN   | HIS | 2  | HB* | 3.42 | CYS | 11 | HN   | TYR | 18 | HD* | 3.85 |
| HIS | 2 | HD2  | CYS | 4  | HA  | 3.10 | CYS | 11 | HN   | TYR | 18 | HE* | 3.91 |
| HIS | 2 | HD2  | CYS | 4  | HB2 | 3.39 | LYS | 12 | HN   | CYS | 11 | HA  | 2.20 |
| HIS | 2 | HD2  | CYS | 4  | HB1 | 3.49 | LYS | 12 | HN   | CYS | 11 | HB1 | 3.99 |
| HIS | 2 | HE1  | CYS | 4  | HA  | 3.82 | LYS | 12 | HN   | CYS | 11 | HB2 | 3.37 |
| HIS | 2 | HD2  | ASN | 13 | HB* | 3.64 | LYS | 12 | HN   | LYS | 12 | HA  | 2.92 |
| HIS | 2 | HE1  | ASN | 13 | HB* | 3.26 | LYS | 12 | HN   | LYS | 12 | HB* | 2.86 |
| HIS | 2 | HD2  | CYS | 14 | HB1 | 3.50 | LYS | 12 | HN   | LYS | 12 | HD* | 6.27 |
| HIS | 2 | HE1  | CYS | 14 | HA  | 4.24 | LYS | 12 | HN   | LYS | 12 | HG* | 3.31 |
| HIS | 2 | HE1  | CYS | 14 | HB1 | 2.63 | LYS | 12 | HN   | ASN | 13 | HA  | 3.79 |
| GLU | 3 | HN   | HIS | 2  | HA  | 2.90 | LYS | 12 | HN   | ASN | 13 | HN  | 2.81 |
| GLU | 3 | HN   | HIS | 2  | HB* | 3.78 | ASN | 13 | HN   | CYS | 11 | HA  | 3.64 |
| GLU | 3 | HB*  | GLU | 3  | HA  | 3.20 | ASN | 13 | HN   | CYS | 11 | HB1 | 3.57 |
| GLU | 3 | HN   | GLU | 3  | HA  | 3.32 | ASN | 13 | HN   | CYS | 11 | HB2 | 3.32 |
| GLU | 3 | HN   | GLU | 3  | HB* | 3.96 | ASN | 13 | HN   | LYS | 12 | HA  | 3.27 |
| CYS | 4 | HN   | HIS | 2  | HD2 | 4.61 | ASN | 13 | HN   | LYS | 12 | HB* | 3.55 |
| CYS | 4 | HN   | GLU | 3  | HA  | 2.21 | ASN | 13 | HN   | LYS | 12 | HG* | 4.14 |
| CYS | 4 | HN   | GLU | 3  | HB* | 3.72 | ASN | 13 | HB*  | ASN | 13 | HA  | 2.64 |
| CYS | 4 | HN   | GLU | 3  | HG* | 4.18 | ASN | 13 | HN   | ASN | 13 | HA  | 2.69 |
| CYS | 4 | HB2  | CYS | 4  | HA  | 2.97 | ASN | 13 | HN   | ASN | 13 | HB* | 2.70 |
| CYS | 4 | HB1  | CYS | 4  | HA  | 2.52 | ASN | 13 | HD22 | ASN | 13 | HA  | 3.87 |
| CYS | 4 | HN   | CYS | 4  | HA  | 2.98 | ASN | 13 | HD22 | ASN | 13 | HB* | 4.21 |
| CYS | 4 | HN   | CYS | 4  | HB2 | 3.14 | ASN | 13 | HN   | CYS | 14 | HN  | 2.46 |
| CYS | 4 | HN   | CYS | 4  | HB1 | 2.96 | ASN | 13 | HN   | GLN | 15 | HN  | 3.53 |
| CYS | 4 | HB1  | ASN | 5  | HA  | 4.00 | CYS | 14 | HN   | CYS | 11 | HB1 | 2.85 |
| CYS | 4 | HN   | ASN | 5  | HN  | 3.44 | CYS | 14 | HN   | CYS | 11 | HB2 | 3.54 |
| CYS | 4 | HB1  | THR | 16 | HB  | 3.37 | CYS | 14 | HN   | ASN | 13 | HA  | 3.46 |
| ASN | 5 | HN   | CYS | 4  | HA  | 2.30 | CYS | 14 | HN   | ASN | 13 | HB* | 2.84 |
| ASN | 5 | HN   | CYS | 4  | HB2 | 3.39 | CYS | 14 | HB2  | CYS | 14 | HA  | 2.17 |
| ASN | 5 | HN   | CYS | 4  | HB1 | 3.33 | CYS | 14 | HB1  | CYS | 14 | HA  | 2.49 |
| ASN | 5 | HB*  | ASN | 5  | HA  | 2.61 | CYS | 14 | HN   | CYS | 14 | HA  | 2.86 |
| ASN | 5 | HN   | ASN | 5  | HA  | 3.08 | CYS | 14 | HN   | CYS | 14 | HB2 | 3.09 |
| ASN | 5 | HN   | ASN | 5  | HB* | 3.96 | CYS | 14 | HN   | CYS | 14 | HB1 | 2.80 |
| ASN | 5 | HD21 | ASN | 5  | HB* | 3.37 | CYS | 14 | HN   | GLN | 15 | HB* | 4.03 |
| ASN | 5 | HD22 | ASN | 5  | HA  | 4.04 | GLN | 15 | HN   | VAL | 10 | HG* | 4.65 |
| ASN | 5 | HD22 | ASN | 5  | HB* | 2.90 | GLN | 15 | HN   | CYS | 11 | HB1 | 2.84 |
| ASN | 5 | HD21 | ALA | 7  | HB* | 4.69 | GLN | 15 | HN   | CYS | 11 | HB2 | 3.65 |
| ASN | 5 | HD22 | ALA | 7  | HB* | 5.30 | GLN | 15 | HN   | LYS | 12 | HA  | 3.56 |
| ASN | 5 | HD21 | LYS | 8  | HD* | 4.98 | GLN | 15 | HE22 | LYS | 12 | HA  | 3.94 |
| ASN | 5 | HD21 | LYS | 8  | HG* | 4.41 | GLN | 15 | HE21 | LYS | 12 | HA  | 4.27 |
| ALA | 6 | HB*  | ASN | 5  | HA  | 4.41 | GLN | 15 | HN   | ASN | 13 | HB* | 5.87 |
| ALA | 6 | HN   | ASN | 5  | HA  | 2.50 | GLN | 15 | HB*  | CYS | 14 | HA  | 3.61 |
| ALA | 6 | HN   | ASN | 5  | HB* | 2.74 | GLN | 15 | HN   | CYS | 14 | HA  | 3.12 |
| ALA | 6 | HN   | ALA | 6  | HA  | 2.86 | GLN | 15 | HN   | CYS | 14 | HB2 | 3.21 |
| ALA | 6 | HN   | ALA | 6  | HB* | 3.04 | GLN | 15 | HN   | CYS | 14 | HB1 | 3.07 |
| ALA | 7 | HB*  | ALA | 7  | HA  | 2.82 | GLN | 15 | HB*  | GLN | 15 | HA  | 2.40 |
| ALA | 6 | HB*  | ALA | 7  | HA  | 4.57 | GLN | 15 | HG*  | GLN | 15 | HA  | 3.15 |
| ALA | 6 | HN   | ALA | 7  | HB* | 5.64 | GLN | 15 | HN   | GLN | 15 | HA  | 2.08 |
| ALA | 6 | HN   | ALA | 7  | HN  | 3.19 | GLN | 15 | HN   | GLN | 15 | HB* | 3.14 |

|     |    |     |     |    |     |      |     |    |      |     |    |      |      |
|-----|----|-----|-----|----|-----|------|-----|----|------|-----|----|------|------|
| ALA | 6  | HN  | LYS | 8  | HN  | 3.07 | GLN | 15 | HN   | GLN | 15 | HG*  | 3.66 |
| ALA | 6  | HB* | TYR | 18 | HA  | 4.52 | GLN | 15 | HN   | GLN | 15 | HE21 | 4.86 |
| ALA | 6  | HB* | TYR | 18 | HB* | 3.73 | GLN | 15 | HN   | GLN | 15 | HE22 | 4.51 |
| ALA | 6  | HN  | TYR | 18 | HD* | 4.40 | GLN | 15 | HE22 | GLN | 15 | HG*  | 4.76 |
| ALA | 6  | HN  | TYR | 18 | HE* | 4.83 | GLN | 15 | HN   | THR | 16 | HB   | 4.97 |
| ALA | 7  | HN  | ASN | 5  | HA  | 3.72 | THR | 16 | HN   | CYS | 11 | HB1  | 2.55 |
| ALA | 7  | HN  | ASN | 5  | HB* | 3.60 | THR | 16 | HN   | CYS | 11 | HB2  | 3.13 |
| ALA | 7  | HN  | ALA | 6  | HA  | 3.26 | THR | 16 | HN   | CYS | 14 | HA   | 4.42 |
| ALA | 7  | HN  | ALA | 6  | HB* | 3.55 | THR | 16 | HN   | CYS | 14 | HB2  | 3.50 |
| ALA | 7  | HN  | ALA | 7  | HA  | 2.82 | THR | 16 | HN   | CYS | 14 | HB1  | 3.53 |
| ALA | 7  | HN  | ALA | 7  | HB* | 2.95 | THR | 16 | HN   | GLN | 15 | HB*  | 3.92 |
| ALA | 7  | HN  | LYS | 8  | HN  | 2.40 | THR | 16 | HG2* | THR | 16 | HA   | 3.20 |
| ALA | 7  | HN  | LYS | 9  | HZ1 | 4.11 | THR | 16 | HG2* | THR | 16 | HB   | 3.18 |
| LYS | 8  | HN  | ALA | 6  | HA  | 4.10 | THR | 16 | HN   | THR | 16 | HA   | 2.55 |
| LYS | 8  | HN  | ALA | 6  | HB* | 4.89 | THR | 16 | HN   | THR | 16 | HB   | 2.48 |
| LYS | 8  | HN  | ALA | 7  | HA  | 3.10 | THR | 16 | HN   | THR | 16 | HG2* | 4.04 |
| LYS | 8  | HN  | ALA | 7  | HB* | 3.63 | ARG | 17 | HN   | THR | 16 | HA   | 2.07 |
| LYS | 8  | HB* | LYS | 8  | HA  | 3.14 | ARG | 17 | HN   | THR | 16 | HB   | 3.67 |
| LYS | 8  | HD* | LYS | 8  | HA  | 3.02 | ARG | 17 | HN   | THR | 16 | HG2* | 3.14 |
| LYS | 8  | HG* | LYS | 8  | HA  | 2.76 | ARG | 17 | HB*  | ARG | 17 | HA   | 2.57 |
| LYS | 8  | HN  | LYS | 8  | HA  | 2.88 | ARG | 17 | HE   | ARG | 17 | HD*  | 3.95 |
| LYS | 8  | HN  | LYS | 8  | HB* | 3.12 | ARG | 17 | HG*  | ARG | 17 | HA   | 3.59 |
| LYS | 8  | HN  | LYS | 8  | HD* | 3.04 | ARG | 17 | HN   | ARG | 17 | HA   | 2.69 |
| LYS | 8  | HN  | LYS | 8  | HG* | 3.05 | ARG | 17 | HN   | ARG | 17 | HB*  | 2.52 |
| LYS | 8  | HN  | LYS | 9  | HZ1 | 2.66 | ARG | 17 | HN   | ARG | 17 | HG*  | 3.77 |
| LYS | 9  | HZ1 | ALA | 6  | HA  | 4.02 | TYR | 18 | HD*  | LYS | 9  | HA   | 4.12 |
| LYS | 9  | HZ1 | ALA | 7  | HA  | 4.94 | TYR | 18 | HE*  | CYS | 4  | HA   | 4.43 |
| LYS | 9  | HZ1 | LYS | 8  | HA  | 3.14 | TYR | 18 | HE*  | CYS | 4  | HB*  | 4.33 |
| LYS | 9  | HZ1 | LYS | 8  | HB* | 4.20 | ASN | 5  | HD21 | ASN | 5  | HA   | 4.85 |
| LYS | 9  | HZ1 | LYS | 8  | HD* | 3.93 | TYR | 18 | HE*  | ASN | 5  | HA   | 4.83 |
| LYS | 9  | HD* | LYS | 9  | HA  | 3.05 | TYR | 18 | HE*  | ASN | 5  | HA   | 3.51 |
| LYS | 9  | HG* | LYS | 9  | HA  | 3.22 | TYR | 18 | HD*  | ALA | 6  | HA   | 3.40 |
| LYS | 9  | HN  | LYS | 9  | HA  | 3.61 | TYR | 18 | HD*  | ALA | 6  | HB*  | 3.72 |
| LYS | 9  | HN  | LYS | 9  | HB* | 2.39 | TYR | 18 | HE*  | ALA | 6  | HB*  | 4.81 |
| LYS | 9  | HN  | LYS | 9  | HD* | 3.64 | TYR | 18 | HD*  | LYS | 9  | HB*  | 3.83 |
| LYS | 9  | HN  | LYS | 9  | HG* | 3.96 | TYR | 18 | HD*  | LYS | 9  | HD*  | 3.41 |
| LYS | 9  | HZ1 | LYS | 9  | HD* | 2.85 | TYR | 18 | HN   | LYS | 9  | HB*  | 3.62 |
| LYS | 9  | HZ1 | LYS | 9  | HE* | 2.77 | TYR | 18 | HN   | LYS | 9  | HN   | 3.25 |
| LYS | 9  | HZ1 | LYS | 9  | HG* | 4.36 | TYR | 18 | HD*  | VAL | 10 | HA   | 3.65 |
| LYS | 9  | HN  | TYR | 18 | HB* | 3.83 | TYR | 18 | HE*  | VAL | 10 | HA   | 4.24 |
| LYS | 9  | HN  | PRO | 20 | HB* | 4.44 | TYR | 18 | HN   | VAL | 10 | HA   | 2.99 |
| LYS | 9  | HN  | PRO | 20 | HD* | 3.01 | TYR | 18 | HN   | VAL | 10 | HG*  | 5.10 |
| VAL | 10 | HG* | LYS | 9  | HA  | 4.85 | TYR | 18 | HE*  | CYS | 11 | HB1  | 3.44 |
| VAL | 10 | HN  | LYS | 9  | HA  | 2.10 | TYR | 18 | HE*  | CYS | 11 | HB2  | 2.81 |
| VAL | 10 | HN  | LYS | 9  | HB* | 3.70 | TYR | 18 | HD*  | THR | 16 | HG2* | 4.63 |
| VAL | 10 | HN  | LYS | 9  | HD* | 3.38 | TYR | 18 | HE*  | THR | 16 | HB   | 3.24 |
| VAL | 10 | HN  | LYS | 9  | HG* | 3.41 | TYR | 18 | HE*  | THR | 16 | HG2* | 4.03 |
| VAL | 10 | HN  | LYS | 9  | HN  | 4.20 | TYR | 18 | HN   | ARG | 17 | HA   | 2.12 |
| VAL | 10 | HB  | VAL | 10 | HA  | 2.86 | TYR | 18 | HN   | ARG | 17 | HB*  | 3.20 |
| VAL | 10 | HG* | VAL | 10 | HA  | 3.17 | TYR | 18 | HN   | ARG | 17 | HG*  | 3.85 |
| VAL | 10 | HG* | VAL | 10 | HB  | 2.76 | TYR | 18 | HN   | ARG | 17 | HN   | 3.72 |
| VAL | 10 | HN  | VAL | 10 | HA  | 2.83 | TYR | 18 | HB*  | TYR | 18 | HA   | 2.55 |
| VAL | 10 | HN  | VAL | 10 | HB  | 2.55 | TYR | 18 | HD*  | TYR | 18 | HA   | 2.81 |
| VAL | 10 | HN  | VAL | 10 | HG* | 3.73 | TYR | 18 | HD*  | TYR | 18 | HB*  | 2.54 |
| VAL | 10 | HG* | LYS | 12 | HA  | 5.34 | TYR | 18 | HN   | TYR | 18 | HA   | 3.20 |
| VAL | 10 | HG* | GLN | 15 | HA  | 3.33 | TYR | 18 | HN   | TYR | 18 | HB*  | 2.88 |
| CYS | 11 | HN  | ARG | 17 | HA  | 3.99 | TYR | 18 | HN   | TYR | 18 | HD*  | 3.15 |
| CYS | 11 | HN  | LYS | 9  | HD* | 4.15 | TYR | 18 | HN   | TYR | 18 | HE*  | 4.31 |
| CYS | 11 | HN  | LYS | 9  | HG* | 5.45 | TYR | 18 | HN   | PRO | 19 | HA   | 3.68 |
| CYS | 11 | HN  | VAL | 10 | HA  | 2.06 | TYR | 18 | HN   | PRO | 19 | HD*  | 3.62 |

|     |    |     |     |    |     |      |     |    |     |     |    |    |      |
|-----|----|-----|-----|----|-----|------|-----|----|-----|-----|----|----|------|
| CYS | 11 | HN  | VAL | 10 | HB  | 3.76 | PRO | 19 | HD* | TYR | 18 | HA | 2.45 |
| CYS | 11 | HN  | VAL | 10 | HG* | 3.71 | PRO | 20 | HD* | PRO | 19 | HA | 2.32 |
| CYS | 11 | HB1 | CYS | 11 | HA  | 2.86 |     |    |     |     |    |    |      |

**Table S5.** Dihedral angle restraints (°) used in calculations with XPLOR for Zn·L<sub>HSP</sub>(HCCC).

|     |    |   |     |    |    |     |    |    |     |    |    |      |      |     |
|-----|----|---|-----|----|----|-----|----|----|-----|----|----|------|------|-----|
| CYS | 2  | C | GLU | 3  | N  | GLU | 3  | CA | GLU | 3  | C  | -120 | -160 | -80 |
| GLU | 3  | C | CYS | 4  | N  | CYS | 4  | CA | CYS | 4  | C  | -120 | -160 | -80 |
| ALA | 6  | C | ALA | 7  | N  | ALA | 7  | CA | ALA | 7  | C  | -65  | -90  | -40 |
| ALA | 7  | C | LYS | 8  | N  | LYS | 8  | CA | LYS | 8  | C  | -120 | -160 | -80 |
| PRO | 20 | C | LYS | 9  | N  | LYS | 9  | CA | LYS | 9  | C  | -120 | -160 | -80 |
| VAL | 10 | C | CYS | 11 | N  | CYS | 11 | CA | CYS | 11 | C  | -65  | -90  | -40 |
| CYS | 11 | C | LYS | 12 | N  | LYS | 12 | CA | LYS | 12 | C  | -65  | -90  | -40 |
| LYS | 12 | C | ASN | 13 | N  | ASN | 13 | CA | ASN | 13 | C  | -120 | -160 | -80 |
| ASN | 13 | C | CYS | 14 | N  | CYS | 14 | CA | CYS | 14 | C  | -120 | -160 | -80 |
| THR | 16 | C | ARG | 17 | N  | ARG | 17 | CA | ARG | 17 | C  | -120 | -160 | -80 |
| ARG | 17 | C | TYR | 18 | N  | TYR | 18 | CA | TYR | 18 | C  | -120 | -160 | -80 |
| CYS | 2  | N | CYS | 2  | CA | CYS | 2  | CB | CYS | 2  | SG | -60  | -90  | -30 |
| HIS | 4  | N | HIS | 4  | CA | HIS | 4  | CB | HIS | 4  | CG | -60  | -90  | -30 |
| CYS | 11 | N | CYS | 11 | CA | CYS | 11 | CB | CYS | 11 | SG | 180  | 150  | 210 |
| CYS | 14 | N | CYS | 14 | CA | CYS | 14 | CB | CYS | 14 | SG | 60   | 30   | 90  |
| CYS | 14 | N | CYS | 14 | CA | CYS | 14 | CB | CYS | 14 | SG | 60   | 30   | 90  |

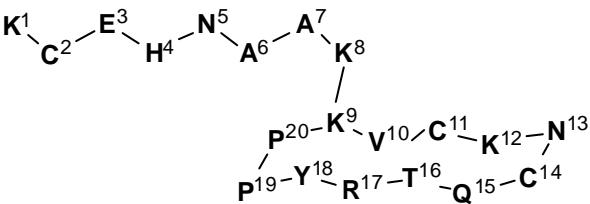

**Scheme S2.** Numbering of amino-acids for the NMR data of L<sub>HSP</sub>(CHCC).

**Table S6.** <sup>1</sup>H NMR (500 MHz) chemical shifts δ (ppm) for Zn·L<sub>HSP</sub>(CHCC) in H<sub>2</sub>O/D<sub>2</sub>O 9:1 (pH 6.2) at 298 K.<sup>a</sup>

| Residue             | HN   | Hα   | Hβ                                              | Others                                                                                                      |
|---------------------|------|------|-------------------------------------------------|-------------------------------------------------------------------------------------------------------------|
| Ac                  |      | 2.00 |                                                 |                                                                                                             |
| LYS 1               | 8.15 | 4.33 | 1.73                                            | CH <sub>2</sub> (γ): 1.35; CH <sub>2</sub> (δ): 1.64; CH <sub>2</sub> (ε): 2.95                             |
| CYS 2               | 8.30 | 4.13 | 2.45 ( <i>pro-S</i> ),<br>2.32 ( <i>pro-R</i> ) | ImH(2), 6.81; ImH(4): 7.95                                                                                  |
| GLU 3               | 8.45 | 4.13 | 1.83, 1.95                                      | CH <sub>2</sub> (γ): 2.05, 2.13                                                                             |
| HIS 4               | 8.63 | 3.97 | 2.72 ( <i>pro-S</i> ),<br>1.93 ( <i>pro-R</i> ) | ImH(2), 6.61; ImH(4): 7.72                                                                                  |
| ASN 5               | 8.03 | 4.77 | 2.76, 2.88                                      | NH <sub>2</sub> (δ), 7.07, 7.77                                                                             |
| ALA 6               | 9.16 | 4.18 | 1.55                                            |                                                                                                             |
| ALA 7               | 8.21 | 4.22 | 1.46                                            |                                                                                                             |
| LYS 8               | 7.61 | 4.34 | 1.80, 2.10                                      | CH <sub>2</sub> (γ): 1.37, 1.46; CH <sub>2</sub> (δ): 1.71; CH <sub>2</sub> (ε): 2.99                       |
| LYS 9               | 7.70 | 4.34 | 0.85                                            | CH <sub>2</sub> (γ): 1.16, 1.36; CH <sub>2</sub> (δ): 1.71; CH <sub>2</sub> (ε): 2.86, 3.49;<br>NH(ζ): 7.41 |
| VAL 10              | 8.15 | 4.29 | 1.73                                            | CH <sub>3</sub> (γ): 0.63, 0.73                                                                             |
| CYS 11              | 8.68 | 4.58 | 2.76 ( <i>pro-S</i> ),<br>3.30 ( <i>pro-R</i> ) |                                                                                                             |
| LYS 12              | 9.19 | 4.18 | 1.94                                            | CH <sub>2</sub> (γ): 1.57; CH <sub>2</sub> (δ): 1.76; CH <sub>2</sub> (ε): 3.08                             |
| ASN 13              | 9.12 | 4.75 | 2.74, 3.01                                      | NH <sub>2</sub> (δ), 7.00, 7.89                                                                             |
| CYS 14              | 8.15 | 4.99 | 3.37 ( <i>pro-S</i> ),<br>2.60 ( <i>pro-R</i> ) |                                                                                                             |
| GLN 15              | 8.01 | 4.02 | 2.32                                            | CH <sub>2</sub> (γ): 2.23; NH <sub>2</sub> (ε), 6.59, 7.32                                                  |
| THR 16              | 8.11 | 4.25 | 3.84                                            | CH <sub>3</sub> (γ): 1.01                                                                                   |
| ARG 17              | 8.60 | 4.83 | 1.70, 1.80                                      | CH <sub>2</sub> (γ): 1.44, 1.61; CH <sub>2</sub> (δ): 3.12, 3.18; NH(ε): 7.24                               |
| TYR 18              | 8.56 | 4.94 | 2.72                                            | CH(δ): 6.64; CH(ε): 6.27                                                                                    |
| <sup>D</sup> PRO 19 | -    | 4.60 | 1.83 ( <i>pro-S</i> ),<br>2.31 ( <i>pro-R</i> ) | CH <sub>2</sub> (γ): 2.01, 2.15; CH <sub>2</sub> (δ): 3.55, 3.85                                            |
| PRO 20              | -    | 4.42 | 1.86 ( <i>pro-R</i> ),<br>2.13 ( <i>pro-S</i> ) | CH <sub>2</sub> (γ): 2.09; CH <sub>2</sub> (δ): 3.71, 3.86                                                  |

<sup>a</sup> Chemical shifts are measured relative to internal DSS.

**Table S7.** <sup>3</sup>J<sub>HN,Hα</sub> coupling constants (Hz) for Zn·L<sub>HSP</sub>(CHCC) in H<sub>2</sub>O/D<sub>2</sub>O 9:1 (pH 6.2) at 298 K.

|        |        |        |        |        |        |        |        |        |
|--------|--------|--------|--------|--------|--------|--------|--------|--------|
| LYS 1  | CYS 2  | GLU 3  | CYS 4  | ASN 5  | ALA 6  | ALA 7  | LYS 8  | LYS 9  |
| -      | 6.2    | 8.4    | 8.5    | -      | -      | 4.9    | 8.8    | 9.9    |
| VAL 10 | CYS 11 | LYS 12 | ASN 13 | CYS 14 | GLN 15 | THR 16 | ARG 17 | TYR 18 |
| -      | 5.0    | 3.5    | 8.2    | 9.5    | 7.5    | -      | 8.2    | 9.0    |

**Table S8.** <sup>3</sup>J<sub>Hα,Hβ</sub> coupling constants (Hz) for Zn·L<sub>HSP</sub>(CHCC) in D<sub>2</sub>O at 298 K.

| CYS 2        |              | HIS 4        |              | CYS 11       |              | CYS 14       |              |
|--------------|--------------|--------------|--------------|--------------|--------------|--------------|--------------|
| <i>pro-R</i> | <i>pro-S</i> | <i>pro-R</i> | <i>pro-S</i> | <i>pro-R</i> | <i>pro-S</i> | <i>pro-R</i> | <i>Pro-S</i> |
| 4.0          | 11.3         | <4           | 14.5         | 12.5         | 4.1          | <4           | <4           |

**Table S9.** NOE-derived distances (Å) used for calculations with XPLOR for Zn-L<sub>HSP</sub>(CHCC).

|     |   |      |     |    |      |      |     |    |      |     |    |      |      |
|-----|---|------|-----|----|------|------|-----|----|------|-----|----|------|------|
| LYS | 1 | HB*  | LYS | 1  | HA   | 3.64 | CYS | 11 | HN   | THR | 16 | HB   | 4.65 |
| LYS | 1 | HN   | LYS | 1  | HA   | 3.08 | CYS | 11 | HN   | THR | 16 | HG2* | 5.12 |
| LYS | 1 | HN   | LYS | 1  | HB*  | 2.89 | CYS | 11 | HN   | THR | 16 | HN   | 3.11 |
| LYS | 1 | HN   | LYS | 1  | HD*  | 4.21 | CYS | 11 | HN   | ARG | 17 | HA   | 3.44 |
| LYS | 1 | HN   | LYS | 1  | HG*  | 3.01 | CYS | 11 | HN   | TYR | 18 | HD*  | 3.53 |
| CYS | 2 | HN   | LYS | 1  | HA   | 2.41 | CYS | 11 | HN   | TYR | 18 | HE*  | 3.47 |
| CYS | 2 | HB1  | CYS | 2  | HA   | 2.85 | LYS | 12 | HN   | CYS | 11 | HA   | 2.19 |
| CYS | 2 | HB2  | CYS | 2  | HA   | 3.10 | LYS | 12 | HN   | CYS | 11 | HB1  | 4.09 |
| CYS | 2 | HN   | CYS | 2  | HA   | 2.88 | LYS | 12 | HN   | CYS | 11 | HB2  | 4.36 |
| CYS | 2 | HN   | CYS | 2  | HB1  | 3.27 | LYS | 12 | HB*  | LYS | 12 | HA   | 2.80 |
| CYS | 2 | HN   | CYS | 2  | HB2  | 2.73 | LYS | 12 | HN   | LYS | 12 | HA   | 2.83 |
| GLU | 3 | HN   | CYS | 2  | HB1  | 3.53 | LYS | 12 | HN   | LYS | 12 | HB*  | 2.72 |
| GLU | 3 | HN   | CYS | 2  | HB2  | 3.51 | LYS | 12 | HN   | CYS | 14 | HN   | 3.54 |
| GLU | 3 | HB*  | GLU | 3  | HA   | 3.00 | ASN | 13 | HB*  | CYS | 2  | HA   | 3.72 |
| GLU | 3 | HG*  | GLU | 3  | HA   | 3.98 | ASN | 13 | HD22 | CYS | 2  | HA   | 4.31 |
| GLU | 3 | HN   | GLU | 3  | HA   | 2.23 | ASN | 13 | HD22 | CYS | 2  | HB2  | 4.75 |
| GLU | 3 | HN   | GLU | 3  | HB*  | 3.37 | ASN | 13 | HD22 | CYS | 2  | HN   | 3.95 |
| GLU | 3 | HN   | GLU | 3  | HG*  | 3.08 | ASN | 13 | HN   | CYS | 11 | HA   | 2.98 |
| GLU | 3 | HN   | HIS | 4  | HD2  | 3.44 | ASN | 13 | HN   | CYS | 11 | HB1  | 3.72 |
| HIS | 4 | HD2  | CYS | 2  | HA   | 3.28 | ASN | 13 | HN   | LYS | 12 | HA   | 3.11 |
| HIS | 4 | HD2  | CYS | 2  | HB1  | 3.36 | ASN | 13 | HN   | LYS | 12 | HB*  | 3.33 |
| HIS | 4 | HD2  | CYS | 2  | HB2  | 3.94 | ASN | 13 | HB*  | ASN | 13 | HA   | 3.04 |
| HIS | 4 | HE1  | CYS | 2  | HB1  | 3.53 | ASN | 13 | HD21 | ASN | 13 | HB*  | 3.66 |
| HIS | 4 | HE1  | CYS | 2  | HB2  | 4.93 | ASN | 13 | HD22 | ASN | 13 | HA   | 4.17 |
| HIS | 4 | HN   | GLU | 3  | HA   | 2.78 | ASN | 13 | HD22 | ASN | 13 | HB*  | 3.16 |
| HIS | 4 | HB1  | HIS | 4  | HA   | 2.71 | ASN | 13 | HN   | ASN | 13 | HA   | 2.81 |
| HIS | 4 | HB2  | HIS | 4  | HA   | 2.93 | ASN | 13 | HN   | ASN | 13 | HB*  | 2.64 |
| HIS | 4 | HD2  | HIS | 4  | HA   | 2.56 | ASN | 13 | HD22 | CYS | 14 | HB1  | 4.83 |
| HIS | 4 | HD2  | HIS | 4  | HB1  | 3.30 | ASN | 13 | HN   | CYS | 14 | HN   | 2.41 |
| HIS | 4 | HE1  | HIS | 4  | HB2  | 4.20 | ASN | 13 | HN   | GLN | 15 | HN   | 3.19 |
| HIS | 4 | HN   | HIS | 4  | HA   | 3.31 | CYS | 14 | HN   | CYS | 11 | HA   | 3.89 |
| HIS | 4 | HN   | HIS | 4  | HB1  | 3.44 | CYS | 14 | HN   | CYS | 11 | HB1  | 3.17 |
| HIS | 4 | HN   | HIS | 4  | HB2  | 3.12 | CYS | 14 | HN   | LYS | 12 | HA   | 4.21 |
| HIS | 4 | HN   | HIS | 4  | HD2  | 3.54 | CYS | 14 | HN   | ASN | 13 | HA   | 3.36 |
| HIS | 4 | HD2  | CYS | 11 | HA   | 3.74 | CYS | 14 | HN   | ASN | 13 | HB*  | 2.79 |
| HIS | 4 | HD2  | CYS | 11 | HB1  | 3.41 | CYS | 14 | HB1  | CYS | 14 | HA   | 2.47 |
| HIS | 4 | HD2  | CYS | 11 | HB2  | 2.51 | CYS | 14 | HB2  | CYS | 14 | HA   | 2.42 |
| HIS | 4 | HE1  | CYS | 11 | HB1  | 5.03 | CYS | 14 | HN   | CYS | 14 | HA   | 2.93 |
| HIS | 4 | HE1  | CYS | 14 | HB1  | 5.24 | CYS | 14 | HN   | CYS | 14 | HB1  | 2.96 |
| HIS | 4 | HE1  | CYS | 14 | HB2  | 4.97 | CYS | 14 | HN   | CYS | 14 | HB2  | 2.95 |
| HIS | 4 | HE1  | THR | 16 | HB   | 3.09 | CYS | 14 | HN   | GLN | 15 | HA   | 6.96 |
| HIS | 4 | HE1  | THR | 16 | HG2* | 4.00 | GLN | 15 | HN   | VAL | 10 | HG*  | 5.11 |
| HIS | 4 | HE1  | TYR | 18 | HE*  | 4.73 | GLN | 15 | HN   | CYS | 11 | HB1  | 2.87 |
| ASN | 5 | HN   | HIS | 4  | HA   | 2.75 | GLN | 15 | HE22 | LYS | 12 | HA   | 4.29 |
| ASN | 5 | HB*  | ASN | 5  | HA   | 2.83 | GLN | 15 | HN   | LYS | 12 | HA   | 3.60 |
| ASN | 5 | HD21 | ASN | 5  | HB*  | 3.53 | GLN | 15 | HN   | ASN | 13 | HB*  | 5.36 |
| ASN | 5 | HD22 | ASN | 5  | HA   | 3.81 | GLN | 15 | HN   | CYS | 14 | HA   | 3.24 |
| ASN | 5 | HD22 | ASN | 5  | HB*  | 2.97 | GLN | 15 | HN   | CYS | 14 | HB1  | 4.25 |
| ASN | 5 | HN   | ASN | 5  | HA   | 2.87 | GLN | 15 | HN   | CYS | 14 | HB2  | 3.21 |
| ASN | 5 | HN   | ASN | 5  | HB*  | 3.11 | GLN | 15 | HB*  | GLN | 15 | HA   | 2.37 |
| ASN | 5 | HD21 | ALA | 7  | HB*  | 4.27 | GLN | 15 | HG*  | GLN | 15 | HA   | 3.91 |
| ASN | 5 | HD22 | ALA | 7  | HB*  | 5.01 | GLN | 15 | HN   | GLN | 15 | HA   | 2.13 |
| ALA | 6 | HN   | ASN | 5  | HA   | 2.35 | GLN | 15 | HN   | GLN | 15 | HB*  | 3.21 |
| ALA | 6 | HN   | ASN | 5  | HB*  | 3.53 | GLN | 15 | HN   | GLN | 15 | HG*  | 3.69 |
| ALA | 6 | HB*  | ALA | 6  | HA   | 2.99 | GLN | 15 | HN   | THR | 16 | HB   | 4.50 |
| ALA | 6 | HN   | ALA | 6  | HA   | 3.16 | THR | 16 | HN   | VAL | 10 | HG*  | 5.11 |
| ALA | 6 | HN   | ALA | 6  | HB*  | 3.51 | THR | 16 | HN   | CYS | 11 | HB1  | 2.47 |
| ALA | 6 | HN   | ALA | 7  | HN   | 3.58 | THR | 16 | HN   | CYS | 11 | HB2  | 3.32 |
| ALA | 7 | HN   | ASN | 5  | HA   | 3.52 | THR | 16 | HN   | GLN | 15 | HA   | 2.17 |

|     |    |     |     |    |     |      |     |    |      |     |    |      |      |
|-----|----|-----|-----|----|-----|------|-----|----|------|-----|----|------|------|
| ALA | 7  | HN  | ASN | 5  | HB* | 4.58 | THR | 16 | HN   | GLN | 15 | HB*  | 3.98 |
| ALA | 7  | HN  | ALA | 6  | HA  | 5.27 | THR | 16 | HG2* | THR | 16 | HA   | 3.30 |
| ALA | 7  | HN  | ALA | 6  | HB* | 3.84 | THR | 16 | HG2* | THR | 16 | HB   | 3.18 |
| ALA | 7  | HB* | ALA | 7  | HA  | 2.82 | THR | 16 | HN   | THR | 16 | HA   | 2.95 |
| ALA | 7  | HN  | ALA | 7  | HA  | 2.69 | THR | 16 | HN   | THR | 16 | HB   | 2.54 |
| ALA | 7  | HN  | ALA | 7  | HB* | 2.97 | THR | 16 | HN   | THR | 16 | HG2* | 4.26 |
| ALA | 7  | HN  | LYS | 8  | HN  | 2.72 | THR | 16 | HG2* | TYR | 18 | HB*  | 4.34 |
| ALA | 7  | HN  | LYS | 9  | HZ1 | 4.10 | ARG | 17 | HN   | VAL | 10 | HG*  | 5.02 |
| LYS | 8  | HN  | ASN | 5  | HB* | 3.78 | ARG | 17 | HN   | THR | 16 | HA   | 2.15 |
| LYS | 8  | HN  | ALA | 6  | HB* | 4.81 | ARG | 17 | HN   | THR | 16 | HB   | 3.31 |
| LYS | 8  | HN  | ALA | 7  | HA  | 3.08 | ARG | 17 | HN   | THR | 16 | HG2* | 3.32 |
| LYS | 8  | HB* | LYS | 8  | HA  | 2.63 | ARG | 17 | HB*  | ARG | 17 | HA   | 3.25 |
| LYS | 8  | HG* | LYS | 8  | HA  | 2.91 | ARG | 17 | HB*  | ARG | 17 | HA   | 3.59 |
| LYS | 8  | HN  | LYS | 8  | HA  | 2.92 | ARG | 17 | HN   | ARG | 17 | HB*  | 2.66 |
| LYS | 8  | HN  | LYS | 8  | HB* | 2.82 | ARG | 17 | HN   | ARG | 17 | HG*  | 3.31 |
| LYS | 8  | HN  | LYS | 8  | HG* | 3.02 | TYR | 18 | HD*  | HIS | 4  | HA   | 3.34 |
| LYS | 8  | HN  | LYS | 9  | HZ1 | 2.54 | TYR | 18 | HD*  | HIS | 4  | HB1  | 3.73 |
| LYS | 9  | HZ1 | ALA | 6  | HA  | 3.36 | TYR | 18 | HE*  | HIS | 4  | HA   | 3.67 |
| LYS | 9  | HZ1 | LYS | 8  | HA  | 3.15 | TYR | 18 | HE*  | HIS | 4  | HB1  | 4.27 |
| LYS | 9  | HZ1 | LYS | 8  | HB* | 3.54 | TYR | 18 | HE*  | ASN | 5  | HB*  | 3.23 |
| LYS | 9  | HB* | LYS | 9  | HA  | 3.44 | TYR | 18 | HD*  | ALA | 6  | HA   | 3.33 |
| LYS | 9  | HD* | LYS | 9  | HE* | 3.88 | TYR | 18 | HD*  | ALA | 6  | HB*  | 4.66 |
| LYS | 9  | HG* | LYS | 9  | HE* | 3.21 | TYR | 18 | HE*  | ALA | 6  | HA   | 3.15 |
| LYS | 9  | HG1 | LYS | 9  | HA  | 2.75 | TYR | 18 | HD*  | LYS | 9  | HB*  | 4.70 |
| LYS | 9  | HG2 | LYS | 9  | HA  | 2.43 | TYR | 18 | HD*  | LYS | 9  | HG*  | 4.61 |
| LYS | 9  | HN  | LYS | 9  | HA  | 2.85 | TYR | 18 | HE*  | LYS | 9  | HB*  | 4.27 |
| LYS | 9  | HN  | LYS | 9  | HB* | 2.83 | TYR | 18 | HE*  | LYS | 9  | HD*  | 3.88 |
| LYS | 9  | HN  | LYS | 9  | HD* | 4.37 | TYR | 18 | HE*  | LYS | 9  | HG*  | 3.61 |
| LYS | 9  | HN  | LYS | 9  | HG* | 2.81 | TYR | 18 | HN   | LYS | 9  | HB*  | 4.53 |
| LYS | 9  | HZ1 | LYS | 9  | HD* | 3.40 | TYR | 18 | HN   | LYS | 9  | HN   | 3.18 |
| LYS | 9  | HZ1 | LYS | 9  | HE* | 2.71 | TYR | 18 | HD*  | VAL | 10 | HA   | 3.65 |
| LYS | 9  | HZ1 | LYS | 9  | HG* | 3.17 | TYR | 18 | HE*  | VAL | 10 | HA   | 4.20 |
| LYS | 9  | HN  | PRO | 20 | HA  | 2.90 | TYR | 18 | HN   | VAL | 10 | HA   | 2.39 |
| LYS | 9  | HN  | PRO | 20 | HB1 | 3.31 | TYR | 18 | HN   | VAL | 10 | HG*  | 4.83 |
| LYS | 9  | HN  | PRO | 20 | HB2 | 3.30 | TYR | 18 | HD*  | CYS | 11 | HB1  | 3.62 |
| LYS | 9  | HN  | PRO | 20 | HD1 | 3.71 | TYR | 18 | HE*  | CYS | 11 | HA   | 3.04 |
| LYS | 9  | HN  | PRO | 20 | HD2 | 2.87 | TYR | 18 | HE*  | CYS | 11 | HB1  | 3.57 |
| VAL | 10 | HN  | LYS | 9  | HA  | 2.24 | TYR | 18 | HD*  | THR | 16 | HB   | 3.97 |
| VAL | 10 | HN  | LYS | 9  | HB* | 3.80 | TYR | 18 | HD*  | THR | 16 | HG2* | 4.54 |
| VAL | 10 | HN  | LYS | 9  | HG* | 4.03 | TYR | 18 | HE*  | THR | 16 | HB   | 3.75 |
| VAL | 10 | HB  | VAL | 10 | HA  | 3.24 | TYR | 18 | HE*  | THR | 16 | HG2* | 5.32 |
| VAL | 10 | HG* | VAL | 10 | HA  | 3.28 | TYR | 18 | HD*  | ARG | 17 | HA   | 3.80 |
| VAL | 10 | HG* | VAL | 10 | HB  | 2.69 | TYR | 18 | HN   | ARG | 17 | HA   | 2.25 |
| VAL | 10 | HN  | VAL | 10 | HA  | 2.66 | TYR | 18 | HN   | ARG | 17 | HB*  | 3.06 |
| VAL | 10 | HN  | VAL | 10 | HG* | 3.88 | TYR | 18 | HN   | ARG | 17 | HG*  | 3.40 |
| VAL | 10 | HG* | GLN | 15 | HA  | 3.57 | TYR | 18 | HB*  | TYR | 18 | HA   | 2.34 |
| VAL | 10 | HA  | ARG | 17 | HA  | 2.85 | TYR | 18 | HD*  | TYR | 18 | HA   | 3.36 |
| VAL | 10 | HG* | ARG | 17 | HA  | 4.28 | TYR | 18 | HD*  | TYR | 18 | HB*  | 2.61 |
| CYS | 11 | HN  | VAL | 10 | HA  | 2.13 | TYR | 18 | HN   | TYR | 18 | HA   | 3.17 |
| CYS | 11 | HN  | VAL | 10 | HB  | 3.67 | TYR | 18 | HN   | TYR | 18 | HB*  | 3.15 |
| CYS | 11 | HN  | VAL | 10 | HG* | 3.67 | TYR | 18 | HN   | TYR | 18 | HD*  | 3.04 |
| CYS | 11 | HB1 | CYS | 11 | HA  | 3.14 | TYR | 18 | HN   | TYR | 18 | HE*  | 4.34 |
| CYS | 11 | HB2 | CYS | 11 | HA  | 2.55 | TYR | 18 | HB*  | PRO | 19 | HD2  | 3.12 |
| CYS | 11 | HN  | CYS | 11 | HA  | 2.81 | TYR | 18 | HD*  | PRO | 19 | HA   | 4.08 |
| CYS | 11 | HN  | CYS | 11 | HB1 | 2.38 | TYR | 18 | HN   | PRO | 19 | HD1  | 4.03 |
| CYS | 11 | HN  | CYS | 11 | HB2 | 2.51 | TYR | 18 | HN   | PRO | 19 | HD2  | 4.15 |
| CYS | 11 | HB1 | GLN | 15 | HA  | 3.50 | PRO | 19 | HD1  | TYR | 18 | HA   | 2.50 |
| CYS | 11 | HN  | GLN | 15 | HA  | 3.72 | PRO | 19 | HD2  | TYR | 18 | HA   | 2.32 |
| CYS | 11 | HN  | GLN | 15 | HN  | 4.05 | PRO | 20 | HD1  | PRO | 19 | HA   | 2.23 |
| CYS | 11 | HB1 | THR | 16 | HB  | 4.31 | PRO | 20 | HD2  | PRO | 19 | HA   | 2.19 |

**Table S10.** Dihedral angle restraints (°) used in calculations with XPLOR for Zn·L<sub>HSP</sub>(CHCC).

|     |    |   |     |    |    |     |    |    |     |    |    |      |      |     |
|-----|----|---|-----|----|----|-----|----|----|-----|----|----|------|------|-----|
| CYS | 2  | C | GLU | 3  | N  | GLU | 3  | CA | GLU | 3  | C  | -120 | -160 | -80 |
| GLU | 3  | C | CYS | 4  | N  | CYS | 4  | CA | CYS | 4  | C  | -120 | -160 | -80 |
| ALA | 6  | C | ALA | 7  | N  | ALA | 7  | CA | ALA | 7  | C  | -65  | -90  | -40 |
| ALA | 7  | C | LYS | 8  | N  | LYS | 8  | CA | LYS | 8  | C  | -120 | -160 | -80 |
| PRO | 20 | C | LYS | 9  | N  | LYS | 9  | CA | LYS | 9  | C  | -120 | -160 | -80 |
| VAL | 10 | C | CYS | 11 | N  | CYS | 11 | CA | CYS | 11 | C  | -65  | -90  | -40 |
| CYS | 11 | C | LYS | 12 | N  | LYS | 12 | CA | LYS | 12 | C  | -65  | -90  | -40 |
| LYS | 12 | C | ASN | 13 | N  | ASN | 13 | CA | ASN | 13 | C  | -120 | -160 | -80 |
| ASN | 13 | C | CYS | 14 | N  | CYS | 14 | CA | CYS | 14 | C  | -120 | -160 | -80 |
| THR | 16 | C | ARG | 17 | N  | ARG | 17 | CA | ARG | 17 | C  | -120 | -160 | -80 |
| ARG | 17 | C | TYR | 18 | N  | TYR | 18 | CA | TYR | 18 | C  | -120 | -160 | -80 |
| CYS | 2  | N | CYS | 2  | CA | CYS | 2  | CB | CYS | 2  | SG | -60  | -90  | -30 |
| HIS | 4  | N | HIS | 4  | CA | HIS | 4  | CB | HIS | 4  | CG | -60  | -90  | -30 |
| CYS | 11 | N | CYS | 11 | CA | CYS | 11 | CB | CYS | 11 | SG | 180  | 150  | 210 |
| CYS | 14 | N | CYS | 14 | CA | CYS | 14 | CB | CYS | 14 | SG | 60   | 30   | 90  |

## References

1. G. Schwarzenbach, H. Flaschka and H. M. N. H. Irving, *Complexometric titrations*, Methuen, London, 1969.
2. O. Sénèque, E. Bourlès, V. Lebrun, E. Bonnet, P. Dumy and J. M. Latour, *Angew. Chem. Int. Ed.*, 2008, 47, 6888-6891.
3. O. Sénèque and J. M. Latour, *J. Am. Chem. Soc.*, 2010, 132, 17760-17774.
4. P. W. Riddles, R. L. Blakeley and B. Zerner, *Method. Enzymol.*, 1983, 91, 49-60.
5. O. Sénèque, E. Bonnet, F. L. Joumas and J. M. Latour, *Chem. Eur. J.*, 2009, 15, 4798-4810.
6. R. Binstead and A. Zuberbühler, *SPECFIT Global Analysis System, Version 3.0*, Spectrum Software Associates, 2000.
7. L. Alderighi, P. Gans, A. Ienco, D. Peters, A. Sabatini and A. Vacca, *Coord. Chem. Rev.*, 1999, 184, 311-318.
8. A. T. Brünger, *A system for X-ray Crystallography and NMR. X-PLOR, version 3.1*, Yale University Press, New Haven, CT, 1992.
